# Supplementary material for: The Oncolytic Poxvirus JX-594 Selectively Replicates in and Destroys Cancer Cells Driven by Genetic Pathways Commonly Activated in Cancers
Source: PubMed Central journal article supplement — Mol Ther. 2011 Dec 20;20(4):749–58. doi: 10.1038/mt.2011.276 (PMC3321594; doi:10.1038/mt.2011.276), 2011-12-20
Supplement: mt2011276x1.pdf [file mt2011276x1.pdf]

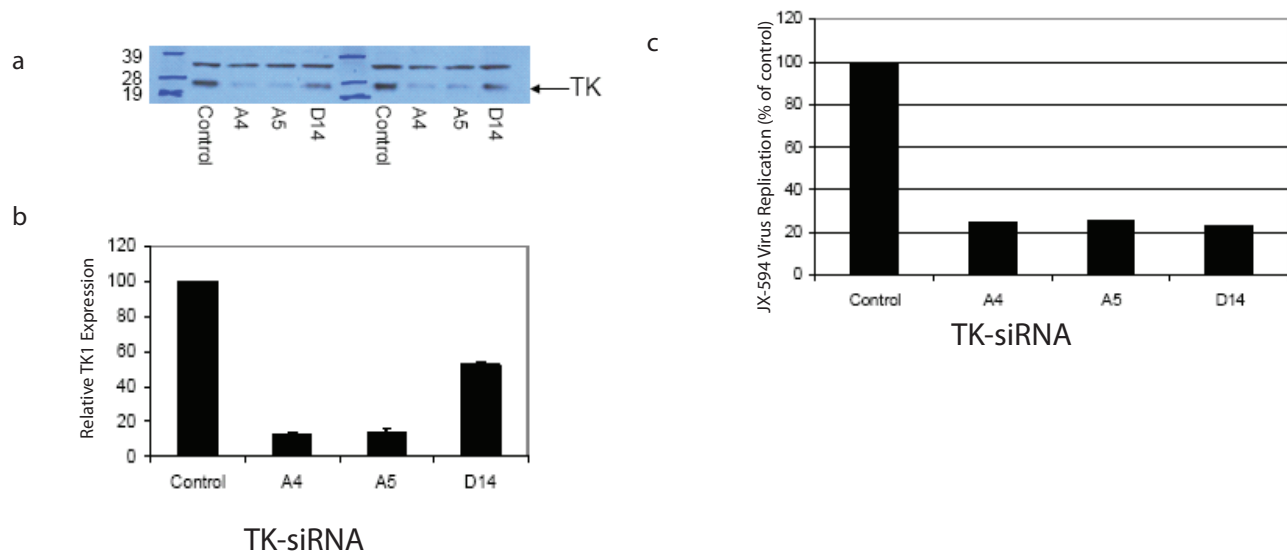

### JX-594 Replication is Attenuated in Cancer Cells Depleted of Cellular Thymidine Kinase.

(a) Western blotting confirming knockdown of endogenous TK in HeLa cells performed by retroviral transduction using three different shRNAs against TK (A4, A5 and D14), or a control shRNA. (b) Western blot quantification using densitometry. (c) JX-594 replication in control or TK-knockdown HeLa clones, following infection with JX-594 in triplicate at MOI 0.001 for 96 h prior to performing plaque assays on infected material (expressed as percent of control values for virus output.)
